# Supplementary material for: Interventions targeting healthcare providers to optimise use of caesarean section: a qualitative comparative analysis to identify important intervention features
Source: Springer Nature journal article supplement (doi:10.1186/s12913-022-08783-9), 2022-12-14

Additional file 1 – Logic model in optimizing CS use

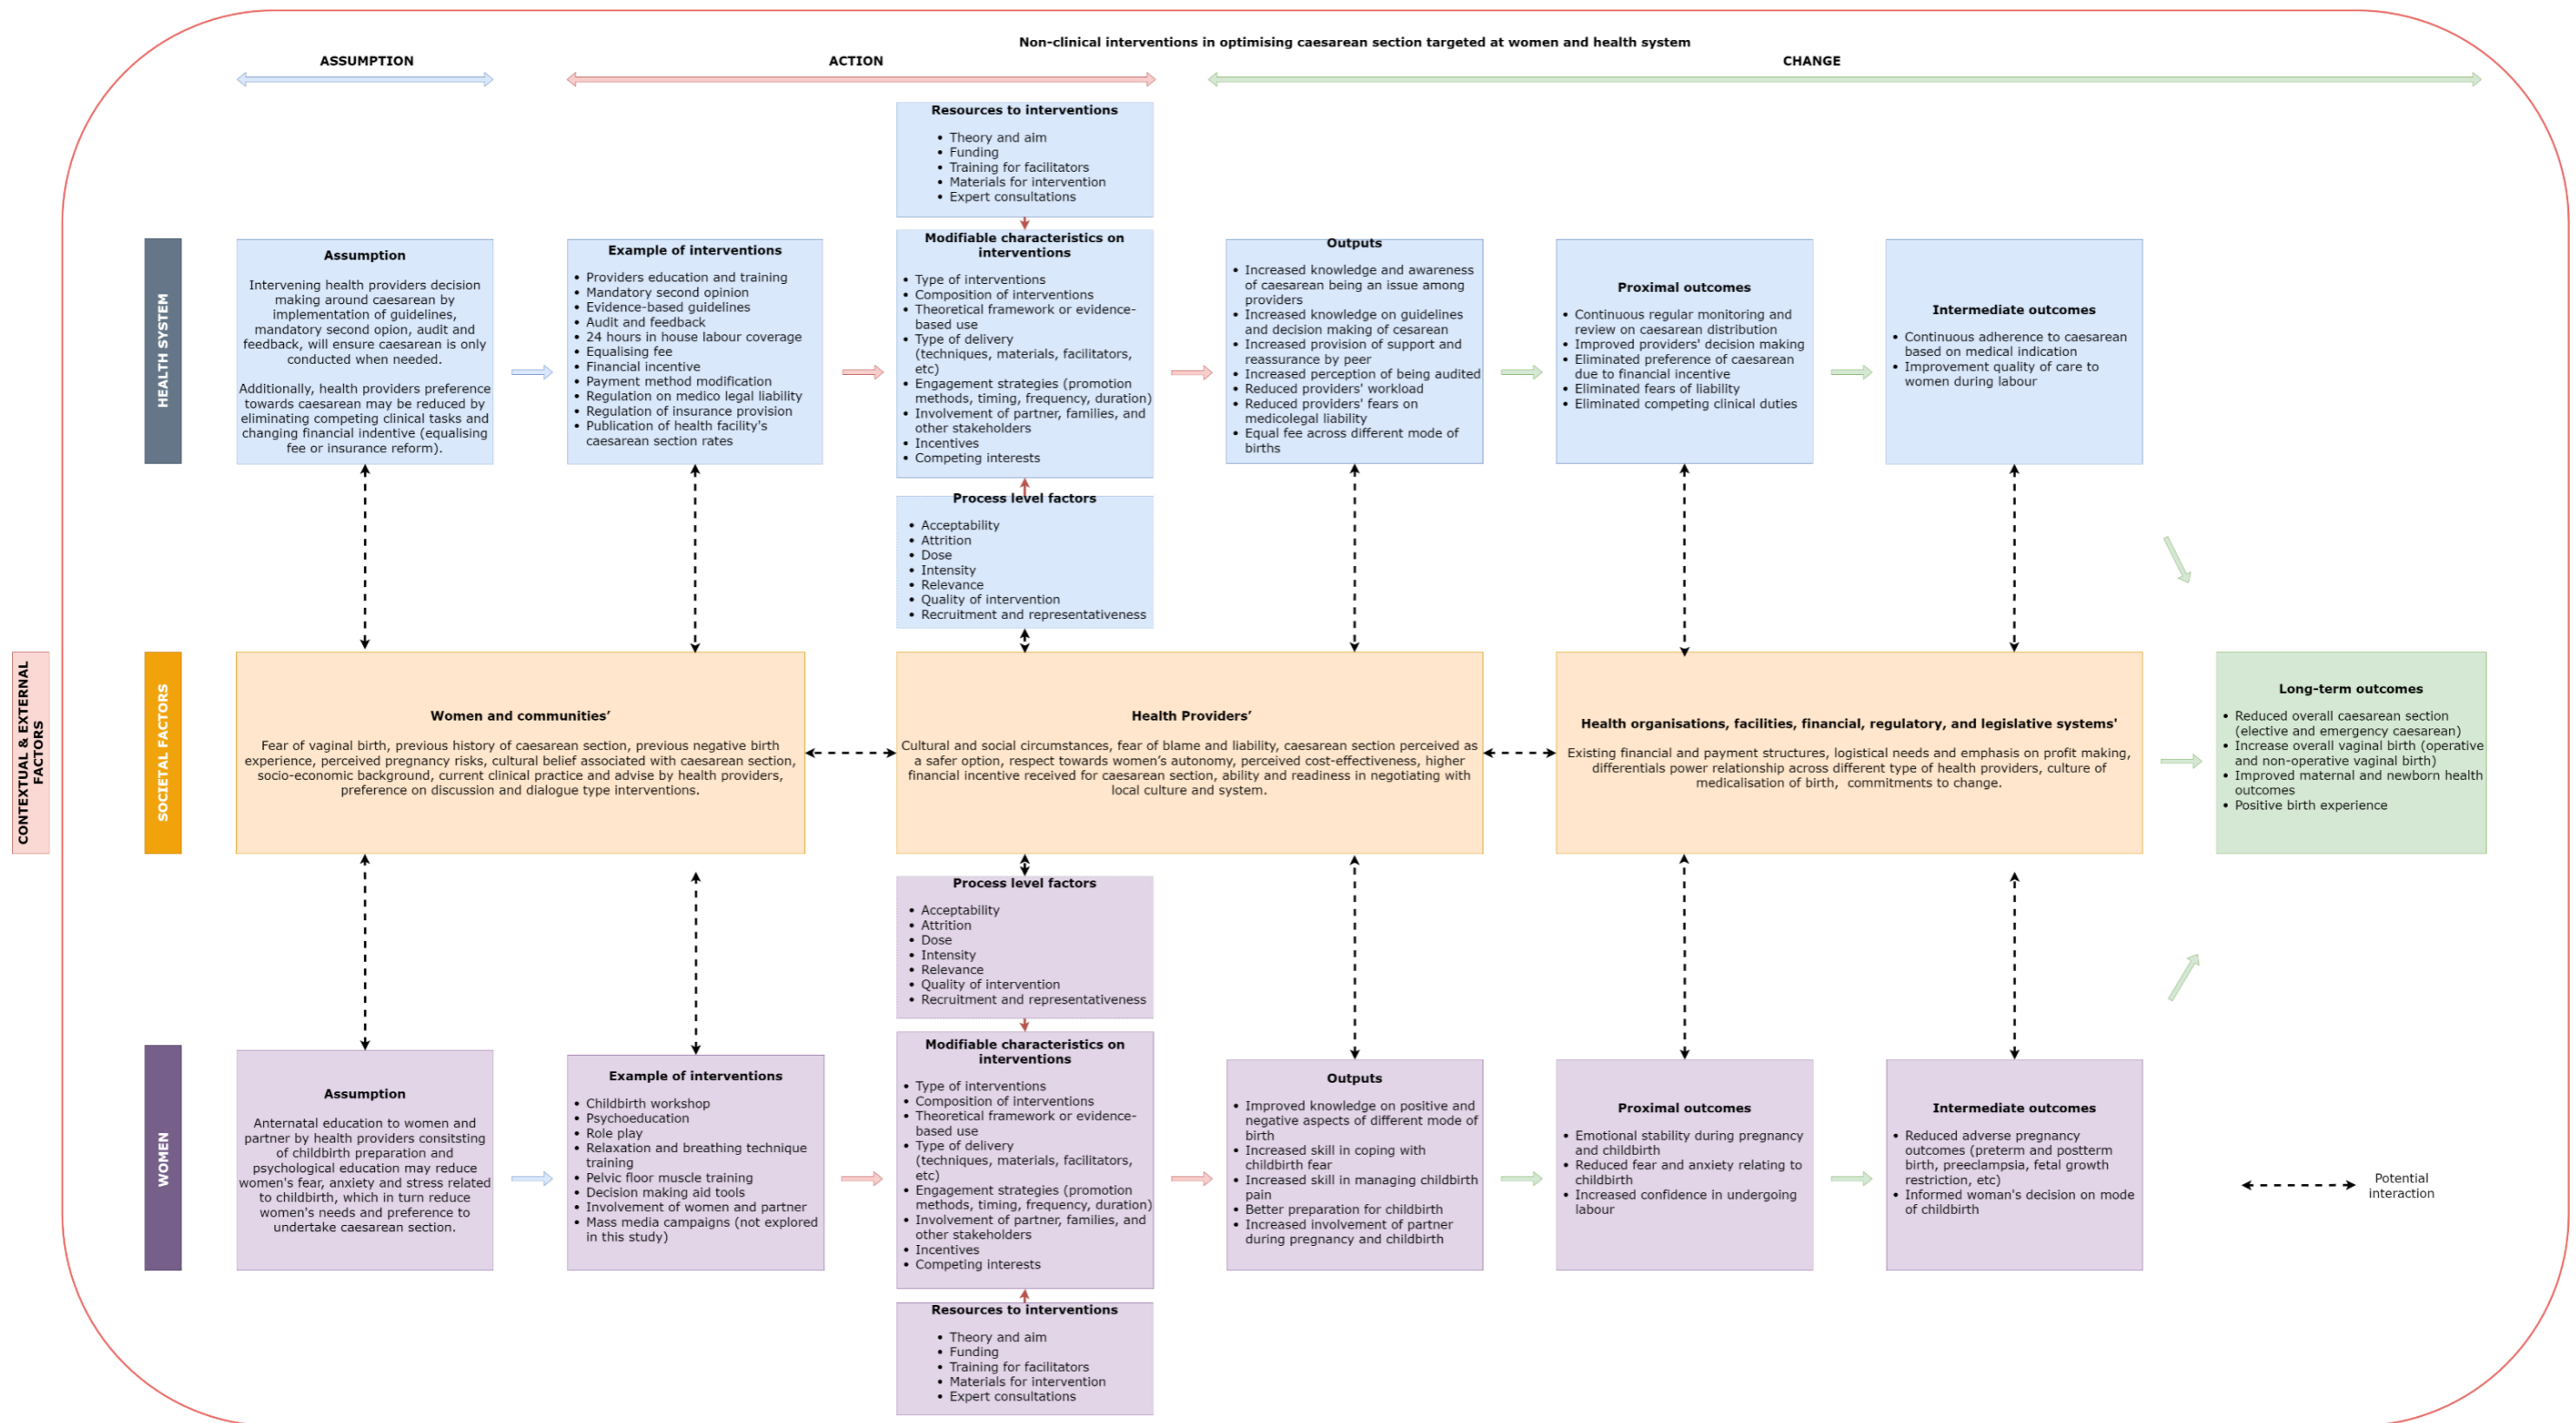

Supplement: MOESM1 [file 23826328]
