# Supplementary material for: Interventions targeting healthcare providers to optimise use of caesarean section: a qualitative comparative analysis to identify important intervention features
Source: Springer Nature journal article supplement (doi:10.1186/s12913-022-08783-9), 2022-12-14
Supplement: MOESM2 [file 23826328]

Additional file 2 – Risk of bias assessment – overview

| Author                                           | Methods                                   | Risks of Bias      | Source             | Tools                                            |
|--------------------------------------------------|-------------------------------------------|--------------------|--------------------|--------------------------------------------------|
| <b>Targeting healthcare providers or systems</b> |                                           |                    |                    |                                                  |
| <b>Calvo 2009</b>                                | Pre- and post-intervention design         | Some concerns      | Current study      | Cochrane EPOC 'Risk of bias' criteria            |
| <b>Ho 2011</b>                                   | Before and after study                    | Some concerns      | Current study      | Cochrane EPOC 'Risk of bias' criteria            |
| <b>Liang 2004</b>                                | Interrupted time series                   | Some concerns      | Chen et al (2018)  | Cochrane EPOC 'Risk of bias' criteria            |
| <b>Mohammadi 2012</b>                            | Retrospective, before-after study         | Some concerns      | Chen et al (2018)  | Cochrane EPOC 'Risk of bias' criteria            |
| <b>Poma 1998</b>                                 | Interrupted time series                   | Some concerns      | Chen et al (2018)  | Cochrane EPOC 'Risk of bias' criteria            |
| <b>Scarella 2011</b>                             | Interrupted time series                   | Some concerns      | Chen et al (2018)  | Cochrane EPOC 'Risk of bias' criteria            |
| <b>Bhartia 2020</b>                              | Interrupted time series                   | Some concerns      | Current study      | Cochrane EPOC 'Risk of bias' criteria            |
| <b>Chaillet 2015</b>                             | Randomized controlled trial               | Low risks of bias  | Chen et al (2018)  | Cochrane EPOC 'Risk of bias' criteria            |
| <b>Kabore 2019</b>                               | Randomized controlled trial               | Some concerns      | Current study      | Cochrane Risk of Bias Tool for randomised trials |
| <b>Kazandjian 1998</b>                           | Retrospective cohort, observational study | Satisfactory study | Current study      | New-castle Ottawa Scale                          |
| <b>Lagrew 1996</b>                               | Interrupted time series                   | Some concerns      | Current study      | Cochrane EPOC 'Risk of bias' criteria            |
| <b>Lomas 1991</b>                                | Randomized controlled trial               | Some concerns      | Chen et al (2018)  | Cochrane EPOC 'Risk of bias' criteria            |
| <b>Robson 1996</b>                               | Interrupted time series                   | Some concerns      | Current study      | Cochrane EPOC 'Risk of bias' criteria            |
| <b>Socol 1993</b>                                | Interrupted time series                   | Some concerns      | Current study      | Cochrane EPOC 'Risk of bias' criteria            |
| <b>van Dillen 2008</b>                           | Uncontrolled before-after study           | Some concerns      | Current study      | Cochrane EPOC 'Risk of bias' criteria            |
| <b>Multi-target interventions</b>                |                                           |                    |                    |                                                  |
| <b>Xia 2019</b>                                  | Uncontrolled before-after study           | Low risks of bias  | Current study      | Cochrane EPOC 'Risk of bias' criteria            |
| <b>Zhang 2020</b>                                | Randomized controlled trial               | Some concerns      | Current study      | Cochrane Risk of Bias Tool for randomised trials |
| <b>Yu 2017</b>                                   | Pre-post intervention study               | Not serious        | Opiyo et al (2020) | GRADE                                            |
| <b>Borem 2020</b>                                | Interrupted time series                   | Not serious        | Opiyo et al (2020) | GRADE                                            |

|                    |                               |               |                   |                                                  |
|--------------------|-------------------------------|---------------|-------------------|--------------------------------------------------|
| <b>Runmei 2012</b> | Controlled before-after study | Some concerns | Chen et al (2018) | Cochrane EPOC 'Risk of bias' criteria            |
| <b>Clarke 2020</b> | Randomized controlled trial   | Some concerns | Current study     | Cochrane Risk of Bias Tool for randomised trials |

Additional File 2.1 – Risk of bias assessment of observational study using Newcastle Ottawa Scale

| <b>Domain</b>                                    |                               | <b>Kazandjian 1998</b> |                                                                                            |
|--------------------------------------------------|-------------------------------|------------------------|--------------------------------------------------------------------------------------------|
|                                                  |                               | <b>Score</b>           | <b>Notes</b>                                                                               |
| <b>Selection (Max. 5)</b>                        | <b>Representativeness</b>     | 1                      | Truly representative (all births during period of interest in the entire hospital network) |
|                                                  | <b>Sample size</b>            | 1                      | Justified and satisfactory                                                                 |
|                                                  | <b>Non-respondents</b>        | 0                      | No provided                                                                                |
|                                                  | <b>Measurement (exposure)</b> | 1                      | Non-validated tool but described                                                           |
| <b>Comparability (Max. 2)</b>                    | <b>Confounding control</b>    | 0                      | Non-participating hospitals as control                                                     |
| <b>Outcomes Measures &amp; Analysis (Max. 3)</b> | <b>Assessment (outcome)</b>   | 1                      | Unblinded                                                                                  |
|                                                  | <b>Statistical test</b>       | 1                      | Statistical test used and appropriate                                                      |
| <b>Final Score / Final Assessment</b>            |                               | 5                      | Satisfactory study                                                                         |

Additional File 2.2 – Risk of bias assessment of randomised controlled trial using Cochrane Risk of Bias Tool for randomised trials

| <b>Author</b>                                              | <b>Kabore 2019</b>                                                                                 | <b>Clarke 2020</b>                                                                                                    | <b>Zhang 2020</b>                                                                     |
|------------------------------------------------------------|----------------------------------------------------------------------------------------------------|-----------------------------------------------------------------------------------------------------------------------|---------------------------------------------------------------------------------------|
| <b>Risk of bias arising from the randomization process</b> | Some concerns                                                                                      | Some concerns                                                                                                         | Low risks                                                                             |
| <b>Notes</b>                                               | Allocation random and concealed after assignment. Higher previous CS history in intervention group | Allocation random and concealed after assignment. Significantly higher number of women in the intervention group with | Allocation random and concealed after assignment. No significant baseline differences |

|                                                                                              |                                                                                                                                                                                                                                                    |                                                                                                                                                                                                                                            |                                                                                                                                                                                   |
|----------------------------------------------------------------------------------------------|----------------------------------------------------------------------------------------------------------------------------------------------------------------------------------------------------------------------------------------------------|--------------------------------------------------------------------------------------------------------------------------------------------------------------------------------------------------------------------------------------------|-----------------------------------------------------------------------------------------------------------------------------------------------------------------------------------|
|                                                                                              |                                                                                                                                                                                                                                                    | higher number of VB history (before previous births)                                                                                                                                                                                       |                                                                                                                                                                                   |
| <b>Risk of bias arising from the timing of identification or recruitment of participants</b> | Low risks                                                                                                                                                                                                                                          | Low risks                                                                                                                                                                                                                                  | Low risks                                                                                                                                                                         |
| <b>Notes</b>                                                                                 | Cluster (hospitals) recruited before randomisation but women were recruited after randomisation                                                                                                                                                    | Cluster (hospitals) recruited before randomisation but women were recruited after randomisation                                                                                                                                            | Hospitals are recruited before randomisation                                                                                                                                      |
| <b>Risk of bias due to deviations from the intended interventions</b>                        | Low risks                                                                                                                                                                                                                                          | Some concerns                                                                                                                                                                                                                              | Low risks                                                                                                                                                                         |
| <b>Notes</b>                                                                                 | Participants (women and healthcare providers) are aware of the trials and may be aware of the assigned intervention                                                                                                                                | Participants (women and healthcare providers) are aware of the trials and may be aware of the assigned intervention. It was mentioned that "the trial team were blinded to the results of the trial" but not the the assigned intervention | Participants (women and healthcare providers) are aware of the trials and may be aware of the assigned intervention. It was mentioned that "No masking was applied in this study" |
| <b>Risk of bias due to missing outcome data</b>                                              | Low risks                                                                                                                                                                                                                                          | Low risks                                                                                                                                                                                                                                  | Low risks                                                                                                                                                                         |
| <b>Notes</b>                                                                                 | No missing outcome data                                                                                                                                                                                                                            | No missing outcome data                                                                                                                                                                                                                    | Random selection at pre- and post-intervention                                                                                                                                    |
| <b>Risk of bias in measurement of the outcome</b>                                            | Low risks                                                                                                                                                                                                                                          | Some concerns                                                                                                                                                                                                                              | Some concerns                                                                                                                                                                     |
| <b>Notes</b>                                                                                 | Seems that the outcomes assessor is blinded -> "Data collectors were aware of the randomization assignments but were not involved in outcome assessments. Access to the database was restricted to the data manager until the trial was completed" | Unclear if the outcomes assessor is blinded or not                                                                                                                                                                                         | Unclear if the outcomes assessor is blinded or not                                                                                                                                |

|                                                         |                                                                                                                       |                                                                                                                       |                                                                                                                       |
|---------------------------------------------------------|-----------------------------------------------------------------------------------------------------------------------|-----------------------------------------------------------------------------------------------------------------------|-----------------------------------------------------------------------------------------------------------------------|
| <b>Risk of bias in selection of the reported result</b> | Low risks                                                                                                             | Low risks                                                                                                             | Low risks                                                                                                             |
| <b>Notes</b>                                            | Seems to be intention to treat analysis. Results are not assessed based on multiple measurements or multiple analysis | Seems to be intention to treat analysis. Results are not assessed based on multiple measurements or multiple analysis | Seems to be intention to treat analysis. Results are not assessed based on multiple measurements or multiple analysis |
| <b>Final Assessment</b>                                 | Some concerns                                                                                                         | Some concerns                                                                                                         | Some concerns                                                                                                         |

Additional File 2.3 – Risk of bias assessment of uncontrolled before and after study using Cochrane EPOC 'Risk of bias' criteria

| Author            | Intervention independent of other changes | Notes               | Shape of the intervention effect pre-specified | Notes                                             | Intervention unlikely to affect data collection | Notes                                                                                                         | Knowledge of the allocated interventions adequately prevented during the study | Notes                             | Incomplete outcome data (attrition bias) | Notes                         | Selective outcome reporting (reporting bias) | Notes                                                                            | Other risks of bias | Notes | Final Assessment |
|-------------------|-------------------------------------------|---------------------|------------------------------------------------|---------------------------------------------------|-------------------------------------------------|---------------------------------------------------------------------------------------------------------------|--------------------------------------------------------------------------------|-----------------------------------|------------------------------------------|-------------------------------|----------------------------------------------|----------------------------------------------------------------------------------|---------------------|-------|------------------|
| <b>Calvo 2009</b> | Unclear risks                             | Unclear, not stated | Low risks                                      | Point of intervention and analysis seems relevant | Low risks                                       | Sources and methods of data collection were the same before and after the intervention: using medical records | Low risks                                                                      | Outcomes are objectively assessed | Unclear risks                            | Unclear how many missing data | Low risks                                    | All relevant outcomes in the methods section are reported in the results section | N/A                 | N/A   | Some concerns    |
| <b>Ho 2011</b>    | Low risks                                 | Covariance assessed | Low risks                                      | Point of intervention and analysis seems relevant | Low risks                                       | Sources and methods of data collection were the same before and after                                         | Low risks                                                                      | Outcomes are objectively assessed | Unclear risks                            | Unclear how many missing data | Low risks                                    | All relevant outcomes in the methods section                                     | N/A                 | N/A   | Some concerns    |

|                     |               |                                                                   |           |                                                   |           |                                                                                                               |           |                                   |               |                               |           |                                                                                  |               |                                                     |               |
|---------------------|---------------|-------------------------------------------------------------------|-----------|---------------------------------------------------|-----------|---------------------------------------------------------------------------------------------------------------|-----------|-----------------------------------|---------------|-------------------------------|-----------|----------------------------------------------------------------------------------|---------------|-----------------------------------------------------|---------------|
|                     |               |                                                                   |           |                                                   |           | the intervention: using medical records                                                                       |           |                                   |               |                               |           | are reported in the results section                                              |               |                                                     |               |
| <b>Bhartia 2020</b> | Low risks     | Contributing factors are related to the implemented interventions | Low risks | Point of intervention and analysis seems relevant | Low risks | Sources and methods of data collection were the same before and after the intervention: using medical records | Low risks | Outcomes are objectively assessed | Unclear risks | Unclear how many missing data | Low risks | All relevant outcomes in the methods section are reported in the results section | N/A           | N/A                                                 | Some concerns |
| <b>Lagrew 1996</b>  | Unclear risks | Unclear, not stated                                               | Low risks | Point of intervention and analysis seems relevant | Low risks | Sources and methods of data collection were the same before and after the intervention: using medical records | Low risks | Outcomes are objectively assessed | Unclear risks | Unclear how many missing data | Low risks | All relevant outcomes in the methods section are reported in the results section | Some concerns | Unclear how long is the intervention implementation | Some concerns |

|                        |               |                                                                                       |           |                                                   |           |                                                                                                               |           |                                   |               |                               |           |                                                                                  |               |                                                                                                  |               |
|------------------------|---------------|---------------------------------------------------------------------------------------|-----------|---------------------------------------------------|-----------|---------------------------------------------------------------------------------------------------------------|-----------|-----------------------------------|---------------|-------------------------------|-----------|----------------------------------------------------------------------------------|---------------|--------------------------------------------------------------------------------------------------|---------------|
| <b>Robson 1996</b>     | Some concerns | There could have been other historic events during this period that weren't mentioned | Low risks | Point of intervention and analysis seems relevant | Low risks | Sources and methods of data collection were the same before and after the intervention: using medical records | Low risks | Outcomes are objectively assessed | Unclear risks | Unclear how many missing data | Low risks | All relevant outcomes in the methods section are reported in the results section | Some concerns | Unclear intensity of the audit and feedback during 1989-1992 (prospective/retrospective audit?). | Some concerns |
| <b>Socol 1993</b>      | Unclear risks | Unclear, not stated                                                                   | Low risks | Point of intervention and analysis seems relevant | Low risks | Sources and methods of data collection were the same before and after the intervention: using medical records | Low risks | Outcomes are objectively assessed | Unclear risks | Unclear how many missing data | Low risks | All relevant outcomes in the methods section are reported in the results section | N/A           | N/A                                                                                              | Some concerns |
| <b>van Dillen 2008</b> | Unclear risks | Unclear, not stated                                                                   | Low risks | Point of intervention and analysis seems relevant | Low risks | Sources and methods of data collection were the                                                               | Low risks | Outcomes are objectively assessed | Low risks     | 3% missing data               | Low risks | All relevant outcomes in the                                                     | N/A           | N/A                                                                                              | Some concerns |

|                 |           |                     |           |                                                   |           |                                                                                                               |           |                                   |           |                                   |           |                                                                                  |     |     |                   |
|-----------------|-----------|---------------------|-----------|---------------------------------------------------|-----------|---------------------------------------------------------------------------------------------------------------|-----------|-----------------------------------|-----------|-----------------------------------|-----------|----------------------------------------------------------------------------------|-----|-----|-------------------|
|                 |           |                     |           |                                                   |           | same before and after the intervention: using medical records                                                 |           |                                   |           |                                   |           | methods section are reported in the results section                              |     |     |                   |
| <b>Xia 2019</b> | Low risks | Covariance assessed | Low risks | Point of intervention and analysis seems relevant | Low risks | Sources and methods of data collection were the same before and after the intervention: using medical records | Low risks | Outcomes are objectively assessed | Low risks | 1000 out of almost 2,000,000 data | Low risks | All relevant outcomes in the methods section are reported in the results section | N/A | N/A | Low risks of bias |
