# Supplementary material for: Interventions targeting healthcare providers to optimise use of caesarean section: a qualitative comparative analysis to identify important intervention features
Source: Springer Nature journal article supplement (doi:10.1186/s12913-022-08783-9), 2022-12-14
Supplement: MOESM3 [file 23826328]

**Additional File 3 – Coding framework and calibration rules**

| <b>Condition</b>                                        | <b>Field</b>                | <b>Instructions for extractors</b>                                                                                             | <b>Calibration type</b>                             | <b>Coding values and calibration rules</b>                                                                                                                                                                                                                                                  |
|---------------------------------------------------------|-----------------------------|--------------------------------------------------------------------------------------------------------------------------------|-----------------------------------------------------|---------------------------------------------------------------------------------------------------------------------------------------------------------------------------------------------------------------------------------------------------------------------------------------------|
| <b>Domain 1 Setting and participants (7 conditions)</b> |                             |                                                                                                                                |                                                     |                                                                                                                                                                                                                                                                                             |
| <b>1.1</b>                                              | Number of participants      | Recorded total number of participants involved in intervention                                                                 | Not calibrated                                      | All studies did not report number of providers but instead only number of women exposed to the interventions, except one study (37).                                                                                                                                                        |
| <b>1.2</b>                                              | Composition of participants | What were the composition of participants? Is it only women, or women and partners?                                            | Direct assignment                                   | Healthcare providers: = yes: 1, no: 0<br>Engaging women: = yes: 1, no: 0                                                                                                                                                                                                                    |
| <b>1.3</b>                                              | Intervention location       | Did the interventions delivered at health facilities, home, or communities?                                                    | Direct assignment                                   | Health facility = yes: 1, no: 0                                                                                                                                                                                                                                                             |
| <b>1.4</b>                                              | Number of health facility   | Recorded number of health facilities implementing the intervention                                                             | Transformational assignment (Ragin's direct method) | 100 or more health facilities = 0<br>10 or more health facilities = 0.5<br>10 or fewer = 1<br><br>Other values span between 0 to 1                                                                                                                                                          |
| <b>1.5</b>                                              | Health facility type        | Was the health facility public or private owned?                                                                               | Direct assignment                                   | Public: = yes: 1, no: 0<br>Private = yes: 1, no: 0                                                                                                                                                                                                                                          |
| <b>1.6</b>                                              | Baseline CS rates           | Recorded baseline CS rates at the health facility                                                                              | Direct assignment                                   | High baseline CS rates (>15%) at study facility = 1<br>High baseline CS rates (>15%) at area/country= 0.66<br>Not reported = 0<br>Not considering baseline rates but mention high preference of CS/increasing CS = 0.33<br>Not considering CS at all OR low based CS rates<10% CS rates = 0 |
| <b>Domain 2 Intervention design (24 conditions)</b>     |                             |                                                                                                                                |                                                     |                                                                                                                                                                                                                                                                                             |
| <b>2.1</b>                                              | Component of interventions  | Extract the type of interventions included: i.e antenatal education, psychosocial education, audit and feedback implementation | Direct assignment to all listed interventions       | Audit and feedback: yes = 1, no = 0<br>Training for healthcare providers: yes = 1, no = 0<br>Actionable recommendations of each audit and feedback cycle: yes = 1, no = 0<br>Multi-disciplinary collaboration: yes = 1, no = 0                                                              |

|            |                                                                     |                                                                                                                              |                                              |                                                                                                                                                                                                                                                                                                                                                                                                                                              |
|------------|---------------------------------------------------------------------|------------------------------------------------------------------------------------------------------------------------------|----------------------------------------------|----------------------------------------------------------------------------------------------------------------------------------------------------------------------------------------------------------------------------------------------------------------------------------------------------------------------------------------------------------------------------------------------------------------------------------------------|
|            |                                                                     |                                                                                                                              |                                              | <p>Organisation of care, including 24-h labour coverage: yes = 1, no = 0</p> <p>Mandatory second opinion: yes = 1, no = 0</p> <p>Opinion leaders: yes = 1, no = 0</p> <p>VBAC advocacy: yes = 1, no = 0</p> <p>Incentives as reward system: yes = 1, no = 0</p> <p>Robson implementation: yes = 1, no = 0</p> <p>Improvement collaboration participation: yes = 1, no = 0</p> <p>Active dissemination of CS indications: yes = 1, no = 0</p> |
| <b>2.2</b> | Utilisation of theoretical framework or evidence-based intervention | Did the study name a theoretical framework that underpins the intervention design or delivery style?                         | Direct assignment                            | <p>Theory driven = 1</p> <p>Citing previous study only = 0.33</p> <p>Missing/Not using any/ambiguous = 0</p>                                                                                                                                                                                                                                                                                                                                 |
| <b>2.3</b> | Type of intervention facilitators or instructors                    | Who were the instructors or facilitators of the intervention? i.e. peers, obstetrician, midwives, doula, other trained staff | Direct assignment to all listed facilitators | <p>Maternity healthcare providers (nurse, midwife, obstetrician): yes = 1; not mentioned as an instructor/facilitator = 0</p> <p>Hospital administrators: yes = 1; not mentioned as an instructor/facilitator = 0</p> <p>Recruited staffs: yes = 1; not mentioned as an instructor/facilitator = 0</p>                                                                                                                                       |
| <b>2.4</b> | Personal or group delivery (training)                               | Did the intervention delivered in a group or personal based delivery through workshop or class?                              | Direct assignment                            | <p>Group delivery: yes = 1, no = 0</p> <p>Personalised/individualised: yes = 1, no = 0</p>                                                                                                                                                                                                                                                                                                                                                   |
| <b>2.5</b> | Audit and feedback results dissemination                            | Did audit and feedback delivered in public or one to one?                                                                    | Direct assignment                            | <p>Publicly: yes = 1, no = 0</p> <p>One to one: yes = 1, no = 0</p>                                                                                                                                                                                                                                                                                                                                                                          |
| <b>2.6</b> | Language tone of the intervention                                   | Is language tone one the interventions reflective or dictated?                                                               | Direct assignment                            | <p>Reflective: yes = 1, no = 0</p> <p>Dictated: yes = 1, no = 0</p>                                                                                                                                                                                                                                                                                                                                                                          |

|                                                |                                                         |                                                                                                                                                                                    |                                           |                                                                                                                                                                      |
|------------------------------------------------|---------------------------------------------------------|------------------------------------------------------------------------------------------------------------------------------------------------------------------------------------|-------------------------------------------|----------------------------------------------------------------------------------------------------------------------------------------------------------------------|
| <b>2.7</b>                                     | Type of materials used                                  | Did the intervention used specific type of materials? i.e. video, computer-based tool, pamphlet, handbook, guidelines                                                              | Direct assignment to all listed materials | IEC materials: yes = 1, no/not reported = 0<br>Guidelines dissemination: yes = 1, no/not reported = 0                                                                |
| <b>2.8</b>                                     | Information about control condition                     | Described whether the authors provided a control for the main intervention (intended to capture complexity of running an intervention and a control) - are they equivalent or not? | Direct assignment                         | No control described/ambiguous = 0<br>Yes, there is control group = 1                                                                                                |
| <b>Domain 3 Program content (6 conditions)</b> |                                                         |                                                                                                                                                                                    |                                           |                                                                                                                                                                      |
| <b>3.1</b>                                     | Content delivered to healthcare providers               | What type of content themes or curriculum delivered to mother and partners? i.e. relaxation technique, information on vaginal birth vs caesarean section risks                     | Direct assignment to all listed content   | CS indication: yes = 1, no = 0<br>Labour management: yes = 1, no = 0<br>VBAC: yes = 1, no = 0<br>Women's autonomy: yes = 1, no = 0                                   |
| <b>3.2</b>                                     | Educational or training technique                       | What were the education or training technique used? i.e. role-play, lecture-based, study cases                                                                                     | Direct assignment to all listed content   | Practice based (practical session, behavioural rehearsal, role play): yes = 1, no = 0, not reported = 0<br>Lecture/didactic based: yes = 1, no = 0, not reported = 0 |
| <b>Domain 4 Engagement (3 conditions)</b>      |                                                         |                                                                                                                                                                                    |                                           |                                                                                                                                                                      |
| <b>4.1</b>                                     | Involvement with partners, families, other stakeholders | Other than participants, were there any other stakeholders included in the intervention?                                                                                           | Direct assignment                         | Yes = 1<br>No = 0                                                                                                                                                    |
| <b>4.2</b>                                     | Frequency of engagement                                 | How often did the intervention delivered (or frequency of engagement/encounter between participants and intervention)? i.e. once in a month, every 3 months                        | Direct assignment                         | Weekly to monthly = 1<br>Every two or three months = 0.75<br>Not reported/Annual = 0                                                                                 |

|                                               |                                                                                          |                                                                                                                       |                   |                                                                                                                                                                                                                                                                                |
|-----------------------------------------------|------------------------------------------------------------------------------------------|-----------------------------------------------------------------------------------------------------------------------|-------------------|--------------------------------------------------------------------------------------------------------------------------------------------------------------------------------------------------------------------------------------------------------------------------------|
| <b>4.3</b>                                    | Existing competing interest                                                              | Was there any competing interest stated?                                                                              | Direct assignment | No = 1<br>Yes/ Not reported = 0                                                                                                                                                                                                                                                |
| <b>Domain 5 Health system (12 conditions)</b> |                                                                                          |                                                                                                                       |                   |                                                                                                                                                                                                                                                                                |
| <b>5.1</b>                                    | Presence of internal policies                                                            | Were there any existing policies in place to support the intervention (both at facility, regional, or country level)? | Direct assignment | No = 0<br>Not reported = 0<br>Yes = 1                                                                                                                                                                                                                                          |
| <b>5.2</b>                                    | Presence of any other support and resources                                              | Were there any existing support from health system which directly or indirectly support the intervention?             | Direct assignment | No = 0<br>Not reported = 0<br>Yes = 1                                                                                                                                                                                                                                          |
| <b>5.3</b>                                    | Perceptions of stakeholders related to the interventions or the caesarean section itself | What were the perceptions of both participants and other relevant stakeholders in regard to caesarean section?        | Direct assignment | Missing/not reported = 0<br>Negative = 0.33<br>Medium/neutral = 0.5<br>More positive, despite few dissatisfaction = 0.66<br>Positive = 1                                                                                                                                       |
| <b>5.4</b>                                    | Local adaptation                                                                         | Any acknowledgment to local adaptation?                                                                               | Direct assignment | No = 0<br>Not reported = 0<br>Yes = 1                                                                                                                                                                                                                                          |
| <b>5.5</b>                                    | Willingness to change                                                                    | Do providers show willingness in engaging with interventions or change on CS practice?                                | Direct assignment | No = 0<br>Not reported = 0<br>Yes = 1                                                                                                                                                                                                                                          |
| <b>5.6</b>                                    | Obstacles perceived                                                                      | Were there any obstacles mentioned by participants or trialists?                                                      | Direct assignment | Complexity of systems: yes = 1, no = 0, not reported = 0<br>Perceived poor training, skills and experience: yes = 1, no = 0, not reported = 0<br>Unsupportive hierarchies/poor teamwork: yes = 1, no = 0, not reported = 0<br>Fear of blame: yes = 1, no = 0, not reported = 0 |
| <b>5.7</b>                                    | Belief associated with CS                                                                | Recorded any belief regarding CS and birth from providers' perspective                                                | Direct assignment | Belief on unnecessary CS: yes = 1, no = 0, not reported = 0<br>Belief on women's autonomy: yes = 1, no = 0, not reported = 0                                                                                                                                                   |

Norms on CS as acceptable: yes = 0, no = 1, not reported = 0

**Domain 6 Process outcomes (5 conditions)**

|            |                           |                                                                                                                                                                                                                                                     |                   |                                                                                                                                                                                                                                                                                                                                                                                                                                                                                                                                                   |
|------------|---------------------------|-----------------------------------------------------------------------------------------------------------------------------------------------------------------------------------------------------------------------------------------------------|-------------------|---------------------------------------------------------------------------------------------------------------------------------------------------------------------------------------------------------------------------------------------------------------------------------------------------------------------------------------------------------------------------------------------------------------------------------------------------------------------------------------------------------------------------------------------------|
| <b>6.1</b> | Intervention fidelity     | Extract level of fidelity (%) or extract qualitative statement on intervention fidelity. Intervention fidelity refers to the degree to which the prescribed components of the intervention, as described in the study protocol, have been delivered | Direct assignment | There is evidence on high fidelity = 1<br>Med fidelity 0.66<br>Low fidelity = 0.33<br>Not reported = 0                                                                                                                                                                                                                                                                                                                                                                                                                                            |
| <b>6.2</b> | Participants satisfaction | Extract level of satisfaction (%) or extract qualitative statement on participants' satisfaction with the intervention experience                                                                                                                   | Direct assignment | Direct assignment - qualitative: where there is a positive statement = 0.66; negative statement = 0.33; where not mentioned = 0<br><br>Direct assignment - quantitative: Interventions with 25% or fewer participants satisfied = 0; with 50% of participants satisfied = 0.5; not mentioned = 0; interventions with >75% participants satisfied = 1                                                                                                                                                                                              |
| <b>6.3</b> | Participants attrition    | Extract participants' level of completion (%) or record qualitative statement on participants' completion rate                                                                                                                                      | Direct assignment | Direct assignment - qualitative: where there is a statement indicating high level of completion, assign value of 0.66; where a statement indicating problematic completion, assign value of 0.33. Where data are missing, assign value of 0<br><br>Direct assignment - quantitative: Interventions with 66% or fewer participants completing the intervention = 0; interventions with 75% of participants completing the intervention = 0.5; interventions with 83% or more participants completing the intervention = 1. Missing data coded as 0 |

|                                                         |                                                                                                                                                                                                                                                                                                                       |                   |                                                                                                                                                                                                                                                                                                                                                                                                                                                                                                                                                                       |
|---------------------------------------------------------|-----------------------------------------------------------------------------------------------------------------------------------------------------------------------------------------------------------------------------------------------------------------------------------------------------------------------|-------------------|-----------------------------------------------------------------------------------------------------------------------------------------------------------------------------------------------------------------------------------------------------------------------------------------------------------------------------------------------------------------------------------------------------------------------------------------------------------------------------------------------------------------------------------------------------------------------|
| <b>6.4</b> Participants dosage level                    | Did the participant receive the intended dosage of the intervention? "intended dosage is the amount of the components of the intervention delivered by implementers and the extent to which participants received and used materials or other resources". Extract level of dosage (%) or record qualitative statement | Direct assignment | <p>Direct assignment - qualitative: where there is a qualitative statement indicating high level of dosage, assign value of 0.66; where a qualitative statement indicating problematic dosage, assign value of 0.33. Where data are missing, assign value of 0</p> <p>Direct assignment - quantitative: Interventions with 66% or fewer participants receiving the full dosage = 0; interventions with 75% of participants receiving the full dosage = 0.5; interventions with 83% or more of participants receiving the full dosage = 1. Missing data coded as 0</p> |
| <b>6.5</b> Participant adherence                        | Did participants adhere to the intervention instructions, e.g. women and partners attending classes; healthcare providers conducted mandatory second opinion. Extract level of adherence (%) or qualitative statement                                                                                                 |                   | <p>Direct assignment - qualitative: where there is a statement indicating high level of adherence, assign value of 0.66; where a qualitative statement indicating problematic adherence, assign value of 0.33. Where data are missing, assign value of 0</p> <p>Direct assignment - quantitative: Interventions with 66% or fewer participants adherent = 0; interventions with 75% of participants adherent = 0.5; interventions with 83% or more participants adherent = 1. Missing data coded as 0</p>                                                             |
| <b>6.6</b> Collateral effect other than to participants | Is there any stated collateral effects on others (other than participants)? i.e. if women obtain 24/7 epidural but no additional human resources are provided to the unit, doctors may need to do more shifts or work longer hours to their in satisfaction.                                                          | Not coded         | Not coded only for consideration whether the intervention is successful or not                                                                                                                                                                                                                                                                                                                                                                                                                                                                                        |

|                                                     |                                                                             |                                                                                                       |                   |                                                                                |
|-----------------------------------------------------|-----------------------------------------------------------------------------|-------------------------------------------------------------------------------------------------------|-------------------|--------------------------------------------------------------------------------|
| <b>6.7</b>                                          | Any other factors affecting the success/unsuccessful of the implementation? | Any other factors affecting the success/unsuccessful of the implementation?                           | Not coded         | Not coded only for consideration whether the intervention is successful or not |
| <b>Domain 7 Type of interventions (1 condition)</b> |                                                                             |                                                                                                       |                   |                                                                                |
| <b>7.1</b>                                          | Type of interventions                                                       | What is the type of interventions? Is it interventions targeting women or multi-target interventions? | Direct assignment | Multi-target interventions: yes = 1, no = 0                                    |
