# Supplementary material for: Interventions targeting healthcare providers to optimise use of caesarean section: a qualitative comparative analysis to identify important intervention features
Source: Springer Nature journal article supplement (doi:10.1186/s12913-022-08783-9), 2022-12-14
Supplement: MOESM4 [file 23826328]

Additional File 4 – Data table on the final models presented

| Author                                              | CS outcome | Frequent engagement | Actionable recommendations | Active dissemination of CS indications | Multi-disciplinary collaboration | Providers' willingness to change | Internal policies | Engaging women | Dictated | Training to improve knowledge and skills | Individual dissemination | Multi-target intervention |
|-----------------------------------------------------|------------|---------------------|----------------------------|----------------------------------------|----------------------------------|----------------------------------|-------------------|----------------|----------|------------------------------------------|--------------------------|---------------------------|
| <b>Interventions targeting healthcare providers</b> |            |                     |                            |                                        |                                  |                                  |                   |                |          |                                          |                          |                           |
| Calvo 2009                                          | 0          | 1                   | 1                          | 1                                      | 0                                | 0                                | 0                 | 0              | 1        | 1                                        | 0                        | 0                         |
| EC9 Ho 2011                                         | 0          | 0                   | 0                          | 0                                      | 1                                | 0                                | 1                 | 0              | 0        | 1                                        | 0                        | 0                         |
| Liang 2004                                          | 0          | 1                   | 1                          | 1                                      | 0                                | 0                                | 1                 | 0              | 1        | 1                                        | 0                        | 0                         |
| Mohammedi 2012                                      | 0          | 1                   | 0                          | 1                                      | 0                                | 0                                | 0                 | 0              | 1        | 0                                        | 1                        | 0                         |
| Poma 1998                                           | 0          | 0                   | 0                          | 1                                      | 0                                | 0                                | 1                 | 0              | 0        | 0                                        | 1                        | 0                         |
| Scarella 2011                                       | 0          | 1                   | 0                          | 1                                      | 1                                | 0                                | 1                 | 0              | 0        | 0                                        | 1                        | 0                         |
| Bhartia 2020                                        | 1          | 1                   | 1                          | 0                                      | 1                                | 1                                | 1                 | 0              | 0        | 1                                        | 0                        | 0                         |
| Chaillet 2015                                       | 1          | 1                   | 1                          | 1                                      | 1                                | 0                                | 0                 | 0              | 0        | 1                                        | 0                        | 0                         |
| Kabore 2019                                         | 1          | 1                   | 1                          | 1                                      | 1                                | 0                                | 0                 | 0              | 0        | 1                                        | 1                        | 0                         |
| Kazandjian 1998                                     | 1          | 0                   | 1                          | 0                                      | 1                                | 0                                | 0                 | 0              | 1        | 1                                        | 0                        | 0                         |
| Lagrew 1996                                         | 1          | 1                   | 1                          | 0                                      | 0                                | 1                                | 0                 | 1              | 0        | 1                                        | 1                        | 0                         |
| Lomas 1991                                          | 1          | 1                   | 1                          | 1                                      | 0                                | 1                                | 0                 | 1              | 0        | 0                                        | 0                        | 0                         |
| Robson 1996                                         | 1          | 1                   | 1                          | 0                                      | 1                                | 1                                | 0                 | 1              | 0        | 1                                        | 1                        | 0                         |
| Socol 1993                                          | 1          | 0                   | 1                          | 1                                      | 0                                | 1                                | 1                 | 0              | 0        | 0                                        | 1                        | 0                         |

|                                   |   |   |   |   |   |   |   |   |   |   |   |   |
|-----------------------------------|---|---|---|---|---|---|---|---|---|---|---|---|
| <b>van Dillen<br/>2008</b>        | 1 | 1 | 1 | 1 | 1 | 1 | 0 | 0 | 0 | 0 | 0 | 0 |
| <b>Multi-target interventions</b> |   |   |   |   |   |   |   |   |   |   |   |   |
| <b>Zhang<br/>2020</b>             | 0 | 0 | 1 | 0 | 0 | 0 | 0 | 1 | 1 | 1 | 0 | 1 |
| <b>Borem<br/>2020</b>             | 1 | 1 | 1 | 0 | 1 | 0 | 0 | 1 | 1 | 1 | 0 | 1 |
| <b>Clarke<br/>2020</b>            | 1 | 1 | 1 | 0 | 1 | 0 | 1 | 1 | 1 | 1 | 0 | 1 |
| <b>Runmei<br/>2012</b>            | 1 | 0 | 1 | 1 | 0 | 0 | 0 | 1 | 1 | 1 | 0 | 1 |
| <b>Xia 2019</b>                   | 1 | 0 | 1 | 0 | 1 | 0 | 1 | 1 | 1 | 1 | 0 | 1 |
| <b>Yu 2017</b>                    | 1 | 1 | 1 | 1 | 0 | 0 | 1 | 1 | 1 | 1 | 0 | 1 |
