# Supplementary material for: Interventions targeting healthcare providers to optimise use of caesarean section: a qualitative comparative analysis to identify important intervention features
Source: Springer Nature journal article supplement (doi:10.1186/s12913-022-08783-9), 2022-12-14
Supplement: MOESM5 [file 23826328]

Additional File 5. Characteristics of included intervention studies

| Author                                              | Sibling studies                                                                  | Country & study years | Intervention                                                                                                                                                                                | Methods                 | Settings                     | Type of women                        | Sample  | Baseline CS rates | Relative effect                                                                                                       | CS Outcomes             | Risk of Bias  |
|-----------------------------------------------------|----------------------------------------------------------------------------------|-----------------------|---------------------------------------------------------------------------------------------------------------------------------------------------------------------------------------------|-------------------------|------------------------------|--------------------------------------|---------|-------------------|-----------------------------------------------------------------------------------------------------------------------|-------------------------|---------------|
| <b>Interventions targeting healthcare providers</b> |                                                                                  |                       |                                                                                                                                                                                             |                         |                              |                                      |         |                   |                                                                                                                       |                         |               |
| <b>Calvo 2009</b>                                   | None                                                                             | Spain<br>2006-2007    | Audit and feedback, protocol implementation, weekly debate, courses for providers and the correction of deficiencies in organization (structural and organizational; not clearly mentioned) | Before and after study  | Two public Spanish hospitals | All pregnant women                   | Unclear | 17.5% and 29.0%   | Overall CS rates at decreased (not statistically significant) from 17.5 to 15.8% and from 29.0 to 22.0%, respectively | Little or no difference | Some concerns |
| <b>Ho 2011</b>                                      | 2 studies: protocol (56) and methodology (development of logical framework) (57) | Malaysia<br>2005-2008 | Audit and feedback, opinion leader's appointment, evidence-based workshops for nurses and doctors, training, academic exchanges                                                             | Before and after study  | Two Malaysian hospital       | All pregnant women                   | 4628    | 43.0%             | Unadjusted RD 7.75 (95% CI 5.3 to 10.2) and adjusted RD 7.56 (2.92 to 12.20)                                          | Increase                | Some concerns |
| <b>Liang 2004</b>                                   | None                                                                             | Taiwan<br>1997-2000   | Audit and feedback, mandatory second opinion, weekly conference, trial of labour after one CS                                                                                               | Interrupted time series | A tertiary hospital          | All pregnant women indicated with CS | 35,602  | 37.0%             | Change in level of total CS at 12 months: -2.4% (-11.4 to 6.7)<br>Change in slope: 1.34% (-2.5 to 5.2)                | Uncertain               | Some concerns |

|                       |                                                  |                    |                                                                                                                                                                             |                            |                                            |                                                                                                  |         |       |                                                                                                                                              |           |                  |
|-----------------------|--------------------------------------------------|--------------------|-----------------------------------------------------------------------------------------------------------------------------------------------------------------------------|----------------------------|--------------------------------------------|--------------------------------------------------------------------------------------------------|---------|-------|----------------------------------------------------------------------------------------------------------------------------------------------|-----------|------------------|
| <b>Mohammadi 2012</b> | None                                             | Iran<br>2005       | Audit and feedback,<br>financial incentives                                                                                                                                 | Before and<br>after study  | An Iranian<br>hospital                     | All pregnant<br>women                                                                            | 3494    | 40.0% | Change in<br>level of total<br>CS at 12<br>months: -<br>14.6% (-24.4<br>to -4.8), P =<br>0.02<br>Change in<br>slope: -0.07%<br>(-1.5 to 1.3) | Uncertain | Some<br>concerns |
| <b>Poma 1998</b>      | None                                             | USA<br>1991-1996   | Audit and feedback,<br>guidelines<br>implementation,<br>review meetings,<br>publication of<br>anonymous individual<br>and department rates,<br>24-hour in-house<br>coverage | Interrupted<br>time series | Community<br>hospital<br>obstetric<br>unit | All pregnant<br>women                                                                            | 12,912  | 22.5% | Change in<br>level of total<br>CS at 12<br>months: -6.6%<br>(-10.1 to -3.2)<br>Change in<br>slope: -0.11%<br>(-0.25 to 0.02)                 | Uncertain | Some<br>concerns |
| <b>Scarella 2011</b>  | None                                             | Chile<br>2007-2008 | Audit and feedback,<br>Robson classification<br>implementation,<br>monthly CS rates<br>distributed by letters,<br>meetings every three<br>month                             | Interrupted<br>time series | A hospital<br>(maternity<br>ward)          | All pregnant<br>women<br>admitted in<br>spontaneous<br>labor or for<br>pregnancy<br>interruption | 4831    | 36.8% | Change in<br>level of CS<br>during<br>intervention: -<br>11% (-23.2 to<br>1.2), NS;<br>change in<br>slope -1.1% (-<br>6.4 to 4.2)            | Uncertain | Some<br>concerns |
| <b>Bhartia 2020</b>   | 1 study:<br>collaboration<br>development<br>(58) | India<br>2011-2016 | Audit and feedback,<br>antenatal class,<br>additional providers<br>recruitment,<br>protocol/guidelines<br>development and                                                   | Interrupted<br>time series | A private<br>hospital in<br>India          | All pregnant<br>women                                                                            | Unclear | 79.0% | Between 2011<br>and 2016, the<br>CS rate<br>declined from<br>52 to 18%, (p<br>< 0.001)                                                       | Decrease  | Some<br>concerns |

|                      |                                                                                             |                           |                                                                                                                                                                                |                                |                              |                       |         |        |                                                                                                                                                                                                                                                                                               |          |                      |
|----------------------|---------------------------------------------------------------------------------------------|---------------------------|--------------------------------------------------------------------------------------------------------------------------------------------------------------------------------|--------------------------------|------------------------------|-----------------------|---------|--------|-----------------------------------------------------------------------------------------------------------------------------------------------------------------------------------------------------------------------------------------------------------------------------------------------|----------|----------------------|
|                      |                                                                                             |                           | implementation,<br>international<br>improvement<br>collaboration, regular<br>training,<br>empowerment of<br>junior obstetrician,<br>group practice, VBAC<br>promotion          |                                |                              |                       |         |        |                                                                                                                                                                                                                                                                                               |          |                      |
| <b>Chaillet 2015</b> | 2 studies:<br>budget impact<br>analysis (59)<br>and cost-<br>effectiveness<br>analysis (60) | Canada<br>2008-2011       | Audit and feedback,<br>providers' training,<br>evidence-based<br>guidelines, local<br>opinion leader                                                                           | Randomized<br>controlled trial | 32<br>hospitals in<br>Quebec | All pregnant<br>women | 184,952 | 22.50% | RD -1.8 (-3.8<br>to -0.2)<br>OR 0.90 (0.80<br>to 0.99)                                                                                                                                                                                                                                        | Decrease | Low risks of<br>bias |
| <b>Kabore 2019</b>   | 2 studies:<br>study protocol<br>(61) and<br>observational<br>study (62)                     | Burkina Faso<br>2014-2016 | Audit and feedback,<br>clinical algorithms<br>(protocol/guidelines),<br>providers' training,<br>dissemination of<br>algorithms through<br>posters, and weekly<br>SMS reminders | Randomized<br>controlled trial | 22 referral<br>hospitals     | All pregnant<br>women | 4174    | 21.40% | The overall CS<br>rate changed<br>from 21.4%<br>(baseline) to<br>20.0% (post-<br>intervention)<br>in the<br>hospitals in<br>the<br>intervention<br>group and<br>from 18.7%<br>(baseline) to<br>20.3% (post-<br>intervention)<br>in the control<br>hospitals<br>(absolute risk<br>difference - | Decrease | Some<br>concerns     |

|                        |                                                                        |                  |                                                                                                                                                |                             |                                        |                    |         |                 |                                                                         |          |                    |
|------------------------|------------------------------------------------------------------------|------------------|------------------------------------------------------------------------------------------------------------------------------------------------|-----------------------------|----------------------------------------|--------------------|---------|-----------------|-------------------------------------------------------------------------|----------|--------------------|
|                        |                                                                        |                  |                                                                                                                                                |                             |                                        |                    |         |                 | 3.1%; 95% CI – 7.2 to 2.6%, P = 0.203)                                  |          |                    |
| <b>Kazandjian 1998</b> | 2 studies: conceptual framework development (55) and case studies (63) | USA 1991-1996    | Adoption of reporting system on caesarean section (QI Project) - similar to audit and feedback                                                 | Observational study         | Hospitals                              | All pregnant women | Unclear | 22.5%           | The total CS rate declined from 22.5% in 1991 to 19.4% in 1996 (p<0.01) | Decrease | Satisfactory study |
| <b>Lagrew 1996</b>     | None                                                                   | USA 1998-1994    | Audit and feedback, guidelines implementation, education, program promotion, prenatal education on VBAC, departmental conferences and meetings | Interrupted time series     | A private hospital                     | All pregnant women | 12,118  | 31.1%           | The overall CS rate fell from 31.1 % to 15.4% (p<0.000001)              | Decrease | Some concerns      |
| <b>Lomas 1991</b>      | 1 study: cross-sectional study (64)                                    | Canada 1988-1989 | Audit and feedback, local opinion leader, guidelines implementation                                                                            | Randomized controlled trial | 16 community hospitals                 | All pregnant women |         | 18.3% and 20.2% | Control: 85.5%, Audit and feedback: 88.3%, opinion leader: 75.1%        | Decrease | Some concerns      |
| <b>Robson 1996</b>     | None                                                                   | USA 1984-1992    | Medical audit cycle implementation                                                                                                             | Interrupted time series     | A hospital                             | All pregnant women | 21,125  | 12.0%           | The overall CS rate was decreased (9.5% vs 12%, p < 0.0001)             | Decrease | Some concerns      |
| <b>Socol 1993</b>      | None                                                                   | USA 1987-1991    | Audit and feedback, guidelines implementation                                                                                                  | Interrupted time series     | A private tertiary university facility | All pregnant women | 26,894  | 27.3%           | The overall CS rate fell from 27.3% to 16.9% (p < 0.0001)               | Decrease | Some concerns      |

|                                   |                                                                                                 |                                           |                                                                                                                                                                               |                                |                                           |                                     |         |                                                |                                                                         |                            |                  |
|-----------------------------------|-------------------------------------------------------------------------------------------------|-------------------------------------------|-------------------------------------------------------------------------------------------------------------------------------------------------------------------------------|--------------------------------|-------------------------------------------|-------------------------------------|---------|------------------------------------------------|-------------------------------------------------------------------------|----------------------------|------------------|
| <b>van Dillen 2008</b>            | None                                                                                            | Netherlands<br>2005-2006                  | Audit and feedback,<br>daily report meetings                                                                                                                                  | Before and<br>after study      | A teaching<br>hospital                    | All pregnant<br>women               | 1221    | 23.4%                                          | The overall CS<br>rate fell from<br>23.4% to<br>18.7%                   | Decrease                   | Some<br>concerns |
| <b>Multi-target interventions</b> |                                                                                                 |                                           |                                                                                                                                                                               |                                |                                           |                                     |         |                                                |                                                                         |                            |                  |
| <b>Zhang 2020</b>                 | None                                                                                            | China<br>2015 - 2017                      | Targeted health<br>education to pregnant<br>women, improved<br>hospital CS policy, and<br>training of<br>midwives/doulas                                                      | Randomized<br>controlled trial | Tertiary<br>and<br>secondary<br>hospitals | Women<br>with low-risk<br>pregnancy | 10,752  | 42.50%<br>at<br>facility<br>level              | OR = 0.92;<br>95% CI 0.73,<br>1.15                                      | Little or no<br>difference | Some<br>concerns |
| <b>Borem 2020</b>                 | None                                                                                            | Brazil<br>2014 - 2016                     | A coalition of<br>stakeholders,<br>empowerment of<br>pregnant women to<br>choose mode of<br>delivery, psychologic<br>birth promotion,<br>information system for<br>providers  | Interrupted<br>time series     | Hospitals                                 | Women<br>with low-risk<br>pregnancy | 119,378 | 78.3%<br>at<br>facility<br>level               | Vaginal<br>deliveries RR<br>1.62 (95% CI<br>1.27 to 2.07, p<br>< 0.001) | Decrease                   | Not serious      |
| <b>Clarke 2020</b>                | 3 studies:<br>process<br>evaluation<br>(65), protocol<br>(66), formative<br>qualitative<br>(67) | Italy, Ireland,<br>Germany<br>2012 - 2016 | Education of clinicians<br>and women with one<br>previous CS,<br>appointment of<br>opinion leaders,<br>audit/peer review, and<br>joint discussions by<br>women and clinicians | Randomized<br>controlled trial | Maternity<br>units                        | Women<br>with<br>previous CS        | 2,002   | VBAC<br>rates <<br>35% at<br>facility<br>level | RR 0.9 (95%CI<br>0.85 to 0.98)                                          | Decrease                   | Some<br>concerns |
| <b>Runmei 2012</b>                | None                                                                                            | China<br>2005 - 2011                      | Education for staffs<br>and women, audits,<br>public health<br>education, monitoring                                                                                          | Before and<br>after study      | Regional<br>referral<br>centre            | Women<br>with low-risk<br>pregnancy | 25,280  | 53.5%-<br>56.1%<br>at<br>facility<br>level     | OR 0.56 (0.52–<br>0.59)                                                 | Decrease                   | Some<br>concerns |

| CS rates, and neonatal outcomes |      |                      |                                                                                                                                                                                                                                                                        |                        |                           |                               |           |                          |                                                                  |          |                   |
|---------------------------------|------|----------------------|------------------------------------------------------------------------------------------------------------------------------------------------------------------------------------------------------------------------------------------------------------------------|------------------------|---------------------------|-------------------------------|-----------|--------------------------|------------------------------------------------------------------|----------|-------------------|
| <b>Yu 2017</b>                  | None | China<br>2006 - 2014 | Face-to-face weekly educational meetings between patients and hospital staff, training for providers, new regulations adoption and projects on CS (i.e. encourage mothers to choose vaginal delivery, strictly control indications for CS and maternal request for CS) | Before and after study | Tertiary public hospitals | Women with low-risk pregnancy | 131,312   | 55-56% at facility level | Overall CS rate declined by 1.29% (p = 0.002)                    | Decrease | Not serious       |
| <b>Xia 2019</b>                 | None | China<br>2010 - 2016 | Programs for population health education, skills training for healthcare professionals, equipment and technical support for local healthcare facilities, and capacity building for the maternal near-miss care system                                                  | Before and after study | Hospitals and community   | Women with low-risk pregnancy | 1,923,687 | 42% at facility level    | Decreasing trend in the monthly CS rates (Z = 75.067, p < 0.001) | Decrease | Low risks of bias |
