# Supplementary material for: Interventions targeting healthcare providers to optimise use of caesarean section: a qualitative comparative analysis to identify important intervention features
Source: Springer Nature journal article supplement (doi:10.1186/s12913-022-08783-9), 2022-12-14
Supplement: MOESM6 [file 23826328]

## Additional File 6. Data extracted from included studies

Data extracted from studies and recoded is available at this link: <https://bit.ly/3KAuB2U>

Please contact the corresponding author with any requests or clarifications: Rana Islamiah Zahroh,  
r.zahroh@unimelb.edu.au
